# Supplementary material
Source: PubMed Central journal article supplement (PMC5986977)
Supplement: mmc1.pdf [file mmc1.pdf]

YMTHE, Volume 26

## **Supplemental Information**

### **Chemotherapy-Induced Long Non-coding RNA 1 Promotes Metastasis and Chemo-Resistance of TSCC via the Wnt/ $\beta$ -Catenin Signaling Pathway**

**Zhaoyu Lin, Lijuan Sun, Shule Xie, Shanyi Zhang, Song Fan, Qunxing Li, Weixiong Chen, Guokai Pan, Weiwei Wang, Bin Weng, Zhang Zhang, Bodu Liu, and Jinsong Li**

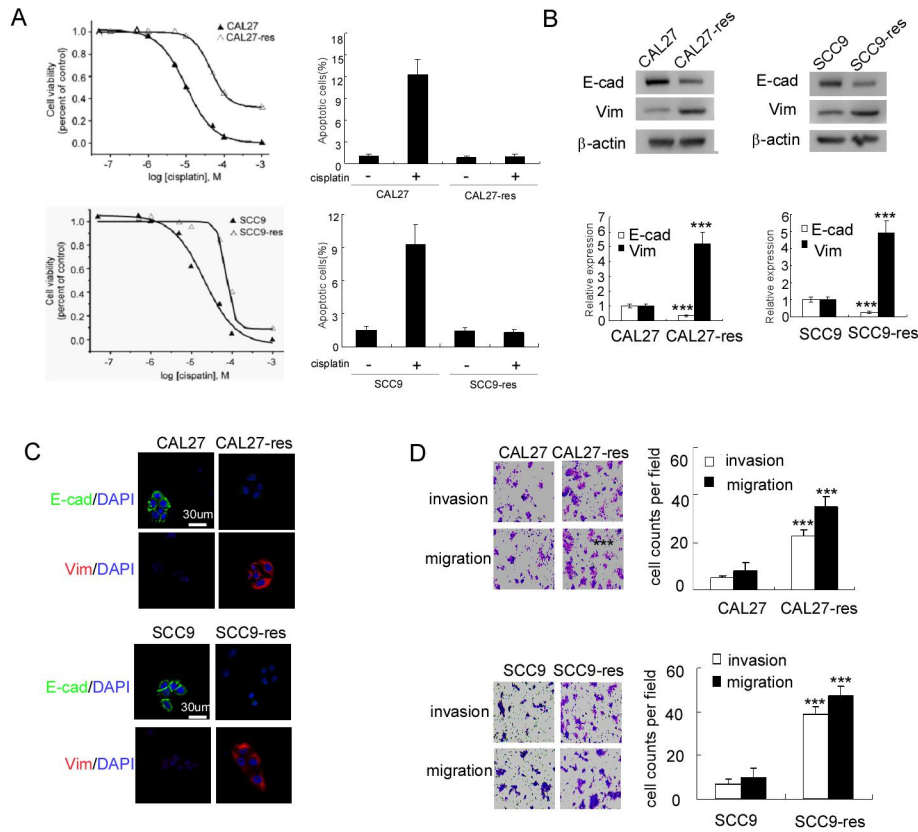

**Supplementary Fig. 1. Cisplatin-resistant TSCC cells have undergone EMT.** (A) MTS assay and flow cytometry were performed to assay cell viability and cell apoptosis. (B) Western blotting, qRT-PCR and (C) immunofluorescence staining illustrated reduced expression of *E-cadherin* (*E-cad*) and increased expression of *vimentin* (*Vim*) in chemoresistant TSCC cells. Nuclei: blue, scale bar: 30 μm. (D) Modified Boyden chamber assays demonstrated enhanced invasion and migration of CAL27-res and SCC9-res cells (100×).

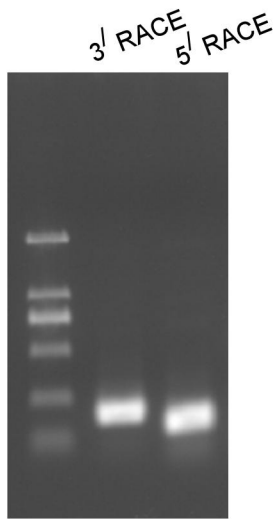

Cloned CILA1 full sequence: 709bp

TGTCTACAGCTCCCAGCTTGAGCCACGCAGAAGATGGG-  
 TGATTTCTGCATTTCCATCTGAGGCTACACCCTGCAAG-  
 GTCATTATCATTAGCTGCACTTTACAGGAGAGGAAGCT-  
 GAGGCTCAGAGAAGCAAACCTGCCCTCCTACTTATGTTGAA  
 GACTTTCCCATCCTATGAGCCCAGGTGGGAGAAGCTGA-  
 AAATGGCAGAAGGTCACTTTTCCAGCTGCCCTGTGCCT-  
 GCACTTCAGGGCCAAGGAGTTTGAAGAAGTCCAAGGTA-  
 GAGCTTCTGGAAAATCCTCTGGAGAGGTTGATCAGAAA  
 CCTTCTCCACATAAACAAAGGACCCAGGAAGAAGCTA-  
 AAAATGGGCCATGAGATTGCTTTTATTCATCAAGCCTG-  
 AAGTTTTCTGACTCTATCTTTCTTTTCCCGTGGCCACT-  
 GTTACCTCTCCAGAACAGACCCCATCACCTGAATTCTGCC  
 TGAGCCTCGACAGATATGCTCAGCTGCTCTCCCATGCT-  
 GGCTGTTGTTACCCCAACCCACTTAAAATTCCTTGAG-  
 GTCTTAGAAGCTCTCTCCACCAAGGTGCCGAAAGAAGT-  
 ATTTACAGGTTCTCAGTGACAATTGTTTATTGAAATTTAC  
 ACTGATGAGAAGTGGTCCCTATTAAGGGAATTC AATC-

**Supplementary Fig. 2.** Full-length CILA1 was cloned and amplified by RACE.

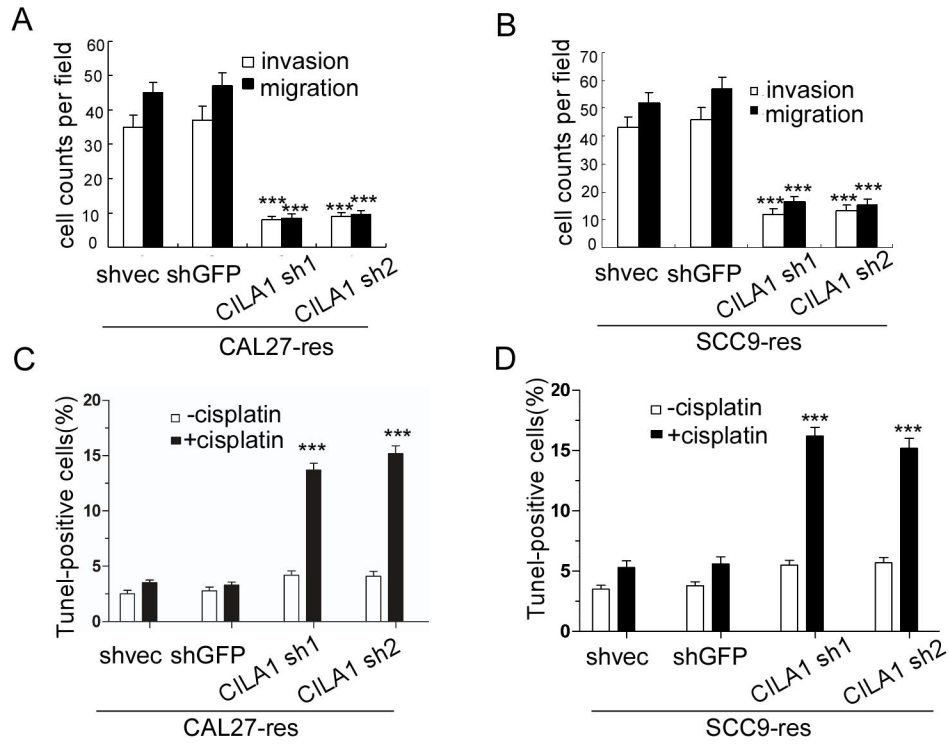

**Supplementary Fig. 3.** (A) and (B) Boyden chamber assays were performed to examine changes in TSCC cell motility following CILA1 downregulation. (C) and (D) TUNEL assays was performed to determine the anti-apoptotic effect following CILA1 downregulation. (\*\*\*) $P < 0.001$

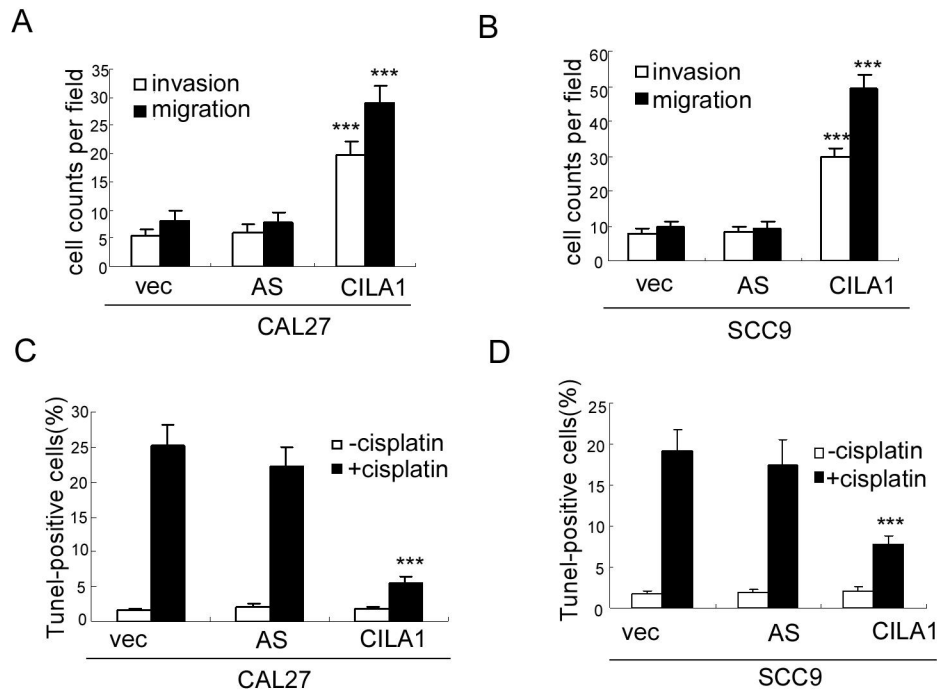

**Supplementary Fig. 4.** (A) and (B) Boyden chamber assays were performed to examine the changes in TSCC cell motility after upregulating CILA1 expression. (C) and (D) TUNEL assays were performed to determine the anti-apoptotic effect of CILA1 following CILA1 upregulation (\*\*\*) $P < 0.001$ ).

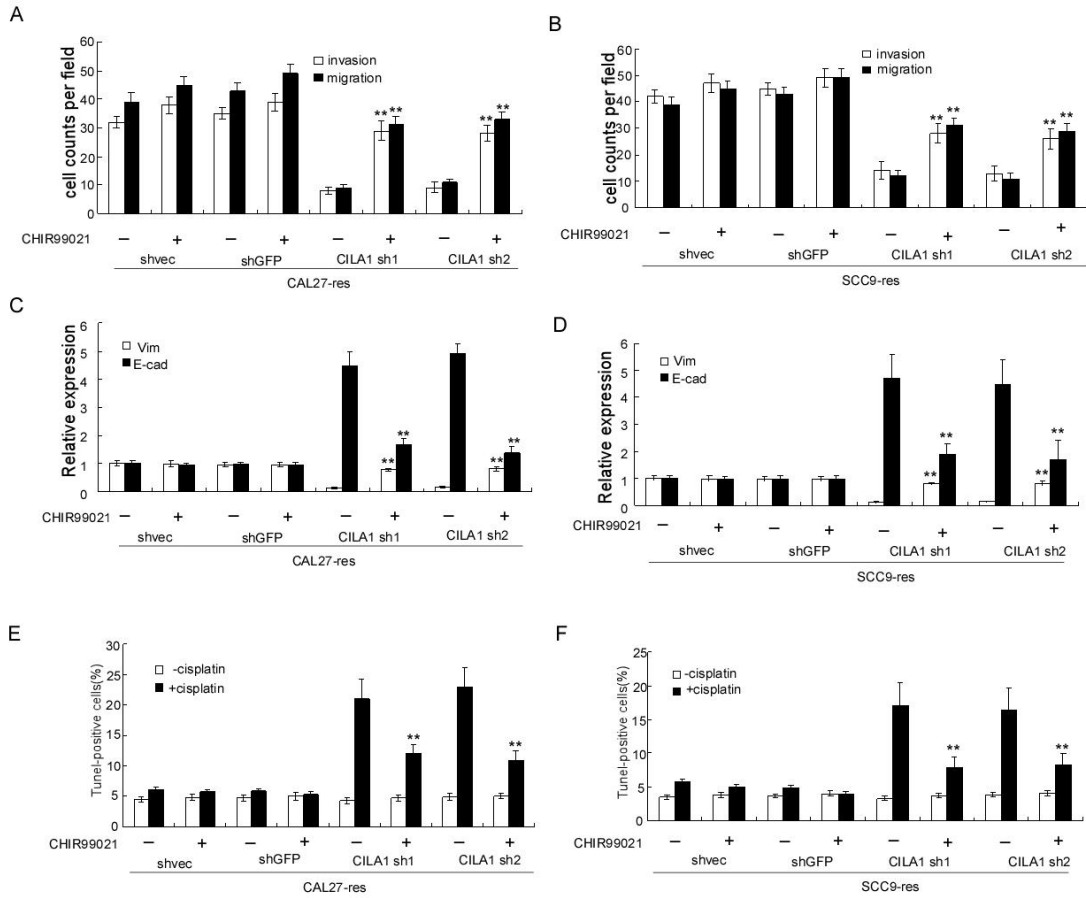

**Supplementary Fig. 5.** (A) and (B) Boyden chamber assays were performed to examine the effect of CHIR99021 on chemoresistant TSCC cell motility. (C) and (D) qRT-PCR was performed to examine the effect of CHIR99021 on chemoresistant TSCC cell EMT-related gene expression. (E) and (F) TUNEL assays were performed to determine the effect of CHIR99021 on chemoresistant TSCC cell apoptosis (\*\* $P < 0.01$ ).

**Supplementary table 1** Fold Change(SCC9-res/SCC9) and Regulation

---

| <b>SEQ_ID</b> | <b>p-value</b>  | <b>FC</b>        | <b>Absolute logFC*(-log(p-value))</b> |
|---------------|-----------------|------------------|---------------------------------------|
| ASLNC08201    | 0.0000151       | 40.070263        | 7.727242741                           |
| ASLNC02104    | 0.0000318       | 20.515862        | 5.901219362                           |
| ASLNC05042    | 0.000236        | 36.86618         | 5.68229812                            |
| DA720951      | 0.000191        | 28.08335         | 5.386733175                           |
| ASLNC18836    | 0.000123        | 21.506205        | 5.21045083                            |
| ASLNC07991    | 0.000182        | 20.374893        | 4.895923106                           |
| ASLNC16165    | 0.000203        | 20.504148        | 4.843980778                           |
| BE144234      | 0.0000182       | 9.462565         | 4.626212396                           |
| ASLNC21850    | 0.000257        | 15.9932          | 4.322208487                           |
| exon2743      | 0.001086614     | 23.32594         | 4.05417226                            |
| ASLNC06390    | 0.000317        | 12.993266        | 3.896834433                           |
| ASLNC23343    | 0.0000827       | 7.949204         | 3.67556631                            |
| <b>CILA1</b>  | <b>0.000729</b> | <b>14.196747</b> | <b>3.614730339</b>                    |
| ASLNC19458    | 0.000068        | 5.5132375        | 3.08980582                            |
| AK124439      | 0.001686586     | 11.955446        | 2.988080764                           |
| ASLNC21657    | 0.001517045     | 11.404633        | 2.979913849                           |
| ASLNC05805    | 0.001378485     | 9.283883         | 2.768285483                           |
| ASLNC16838    | 0.000126        | 5.0987124        | 2.758833865                           |
| ASLNC12735    | 0.000416        | 6.504114         | 2.749313222                           |
| ASLNC16219    | 0.000167        | 5.228774         | 2.7136                                |
| ASLNC07749    | 0.000533        | 6.318715         | 2.62067636                            |
| ASLNC06008    | 0.001089988     | 7.3489647        | 2.566262814                           |
| exon655       | 0.000406        | 5.587273         | 2.534108981                           |
| AV747682      | 0.000337        | 5.026671         | 2.435105305                           |
| BX093190      | 0.002106526     | 7.8673916        | 2.397631187                           |
| ASLNC05502    | 0.0013531       | 6.6181087        | 2.354414792                           |
| ASLNC15926    | 0.000931        | 5.9120216        | 2.339170686                           |
| ASLNC01712    | 0.002056881     | 7.262441         | 2.313548883                           |
| ASLNC21104    | 0.003139346     | 8.216363         | 2.28959018                            |
| ASLNC18399    | 0.00182934      | 6.8335896        | 2.285022923                           |
| exon2903      | 0.003491177     | 8.311547         | 2.259684215                           |
| ASLNC01284    | 0.002171475     | 7.0177984        | 2.253640425                           |
| AK129581      | 0.006394999     | 10.48987         | 2.239732445                           |
| ASLNC04384    | 0.001681384     | 6.162041         | 2.190959044                           |

---

---

|            |             |           |             |
|------------|-------------|-----------|-------------|
| AI744597   | 0.012906011 | 14.403054 | 2.188561641 |
| ASLNC16096 | 0.002514039 | 6.338377  | 2.08484463  |
| ASLNC23349 | 0.005283073 | 8.189105  | 2.079542923 |
| BF873246   | 0.002337037 | 5.989154  | 2.045508539 |
| ASLNC16161 | 0.015383688 | 12.371554 | 1.980499123 |
| ASLNC19113 | 0.003221265 | 5.673729  | 1.878620579 |
| ASLNC21416 | 0.003682749 | 5.836801  | 1.8647378   |
| ASLNC01049 | 0.005621055 | 6.5286674 | 1.833503657 |
| BG218484   | 0.007063437 | 6.802415  | 1.791044993 |
| ASLNC09657 | 0.004059661 | 5.5203705 | 1.774424604 |
| ASLNC22042 | 0.004811209 | 5.4663224 | 1.709790033 |
| ASLNC24861 | 0.00502692  | 5.3837442 | 1.680542306 |
| AI935368   | 0.042484835 | 16.761286 | 1.679463256 |
| ASLNC15095 | 0.020478671 | 9.830807  | 1.676183576 |
| ASLNC21501 | 0.00573784  | 5.3347864 | 1.629652194 |
| ASLNC19961 | 0.009945265 | 6.405494  | 1.615027789 |
| ASLNC19152 | 0.005202038 | 5.025704  | 1.601412062 |
| ASLNC02044 | 0.00931661  | 5.991583  | 1.578986408 |
| ASLNC10793 | 0.009341336 | 5.965947  | 1.574311916 |
| ASLNC02958 | 0.006064923 | 5.0701323 | 1.563150943 |
| ASLNC02761 | 0.010878156 | 6.21361   | 1.557687068 |
| AA935188   | 0.013426022 | 6.504708  | 1.522405265 |
| ASLNC01418 | 0.012773945 | 6.3594394 | 1.521414125 |
| ASLNC07466 | 0.0256155   | 6.98567   | 1.343554741 |
| ASLNC04559 | 0.022237668 | 5.8499594 | 1.268035202 |
| exon653    | 0.038682684 | 7.7552176 | 1.256536741 |
| ASLNC01177 | 0.022332508 | 5.669594  | 1.244161385 |
| ASLNC09871 | 0.028852765 | 6.425439  | 1.244018888 |
| ASLNC03863 | 0.019566856 | 5.1736703 | 1.219510138 |
| exon654    | 0.032520954 | 6.53382   | 1.212835645 |
| ASLNC06505 | 0.027760431 | 5.106413  | 1.102234712 |
| ASLNC16599 | 0.002555202 | 17.212223 | 3.203999722 |

---



**Supplementary table 2** Primers for genes involved in qRT-PCR.

| Gene name        |         | primer                 |
|------------------|---------|------------------------|
| bc016962         | Forward | AATCTTTGCAGGTGGGCATG   |
|                  | Reverse | TTGACCTGCTCATCCCAAAC   |
| ak094950         | Forward | attgcatgctcccacgaac    |
|                  | Reverse | aaccctaactccagatgtgtcg |
| ak001058         | Forward | tgggggtaagcacaatcc     |
|                  | Reverse | aatggcaaagcagcacagag   |
| be144234         | Forward | accaagcgagaaggaactcag  |
|                  | Reverse | tcagtggcatgttgaaagc    |
| al359062         | Forward | actcggcacaatcaaaggc    |
|                  | Reverse | aggctcgaaatgggtctttg   |
| bc042436         | Forward | atgccgcaaaggttggtg     |
|                  | Reverse | atgtgccttccccctttcag   |
| CILA1            | Forward | tgggtgatttctgcgtttcc   |
|                  | Reverse | agcttcctctctgtaaagtgc  |
| E-cadherin       | Forward | GCCGCTGGCGTCTGTAGGAA   |
|                  | Reverse | TGACCACCGCTCTCCTCCGA   |
| $\beta$ -catenin | Forward | CCAGCCGACACCAAGAAGCA   |
|                  | Reverse | GCGGGACAAAGGGCAAGATT   |
| vimentin         | Forward | TGGATTCACTCCCTCTGGTTG  |
|                  | Reverse | CGTGATGCTGAGAAGTTTCGTT |
| GAPDH            | Forward | ACCCAGAAGACTGTGGATGG   |
|                  | Reverse | GAGGCAGGGATGATGTTCTG   |

**Supplementary table 3** Primary antibodies used in the study.

| Antibody                            | MV<br>(KDa) | Sources (Catalogue #)                            | Dilution            |
|-------------------------------------|-------------|--------------------------------------------------|---------------------|
| E-cadherin                          | 135         | Cell Signaling Technology (#3195) (Beverly, MA)  | WB:1:2000, IF:1:200 |
| Vimentin                            | 57          | Cell Signaling Technology (#5741) (Beverly, MA)  | WB:1:2000, IF:1:100 |
| GSK3 $\beta$                        | 46          | Cell Signaling Technology (#9315) (Beverly, MA)  | WB:1:1000           |
| p-GSK3 $\beta$ (Ser9)               | 46          | Cell Signaling Technology (#9336) (Beverly, MA)  | WB:1:1000           |
| $\beta$ -catenin                    | 92          | Cell Signaling Technology (#8480) (Beverly, MA)  | WB:1:2000,IF:1:100  |
| p- $\beta$ -catenin(Ser33/37/Thr41) | 92          | Cell Signaling Technology (#9561) (Beverly, MA)  | WB:1:1000           |
| c-Myc                               | 57          | Cell Signaling Technology (#9402) (Beverly, MA)  | WB:1:1000           |
| survivin                            | 16          | Santa cruz( #sc-D8) (California)                 | WB:1:200            |
| Lamin B1                            | 68          | Cell Signaling Technology (#13435) (Beverly, MA) | WB:1:1000           |
| PCNA                                | 36          | Cell Signaling Technology (#2586) (Beverly, MA)  | IHC: 1:4000         |
| GAPDH                               | 36          | Proteintech,( #10494) (Chicago, IL)              | WB:1:5000           |
| $\beta$ -actin                      | 45          | Cell Signaling Technology (#3700) (Beverly, MA)  | WB:1:1000           |
